# Supplementary material
Source: PubMed Central journal article supplement (PMC3730921)
Supplement: 429056c6cee6fae7aa62bc7aa688a2f6_genetics.113.151670-6.pdf [file 429056c6cee6fae7aa62bc7aa688a2f6_genetics.113.151670-6.pdf]

**Table S4** Complex mutations occurring during mutation accumulation, all confirmed by Sanger sequencing.

| Coordinates    | Mutation                               | Mutant line |
|----------------|----------------------------------------|-------------|
| chr2R:3026177  | GGCTATCTTTCTTTCGGAACATTACC→GTATTATTCCT | 33-27       |
| chrX:19646896  | GCAGG→GAAAAGCA                         | 33-27       |
| chr2R:17877493 | GTGCC→GGGT                             | 33-55       |
| chr2L:9526339  | CTATATATGTAG→CATCC                     | 39-51       |
| chr3R:27194562 | CC→CAG                                 | 39-51       |
| chrX:3816859   | ATTTT→ATGT                             | 39-51       |
| chr2L:7806673  | AGATAGGC→AAT                           | 39-58       |
