# Supplementary material
Source: PubMed Central journal article supplement (PMC3730921)
Supplement: bb00a593f453aace00b3a4d8ce8bb7d0_genetics.113.151670-7.pdf [file bb00a593f453aace00b3a4d8ce8bb7d0_genetics.113.151670-7.pdf]

**Table S3** Multinucleotide mutations occurring during mutation accumulation, all confirmed by Sanger sequencing.

| Chromosome arm | Coordinates               | Mutation       | Mutant line |
|----------------|---------------------------|----------------|-------------|
| chr2L          | 20628928, 20628930        | G->A;T->G      | 33-27       |
| chr3R          | 2065681, 2065685          | G->A;C->A      | 33-27       |
| chr2L          | 7161924, 7161927          | G->A;A->T      | 33-45       |
| chr2R          | 11166158, 11166159        | G->A;C->A      | 33-45       |
| chr3R          | 18338533, 18338550        | T->C;G->T      | 33-45       |
| chr2L          | 19248550, 9248551         | A->T;G->T      | 33-5        |
| chr3R          | 19467135, 19467136        | A->T;T->A      | 33-55       |
| chrX           | 5940420, 5940434, 5940463 | G->A;G->A;T->C | 33-55       |
| chr3L          | 13034276, 13034277        | T->A;A->T      | 39-51       |
| chrX           | 15730179, 15730181        | T->A;T->A      | 39-58       |
