# Supplementary material
Source: PubMed Central journal article supplement (PMC3730921)
Supplement: da4ea104a213284d76879880e951a761_genetics.113.151670-1.pdf [file da4ea104a213284d76879880e951a761_genetics.113.151670-1.pdf]

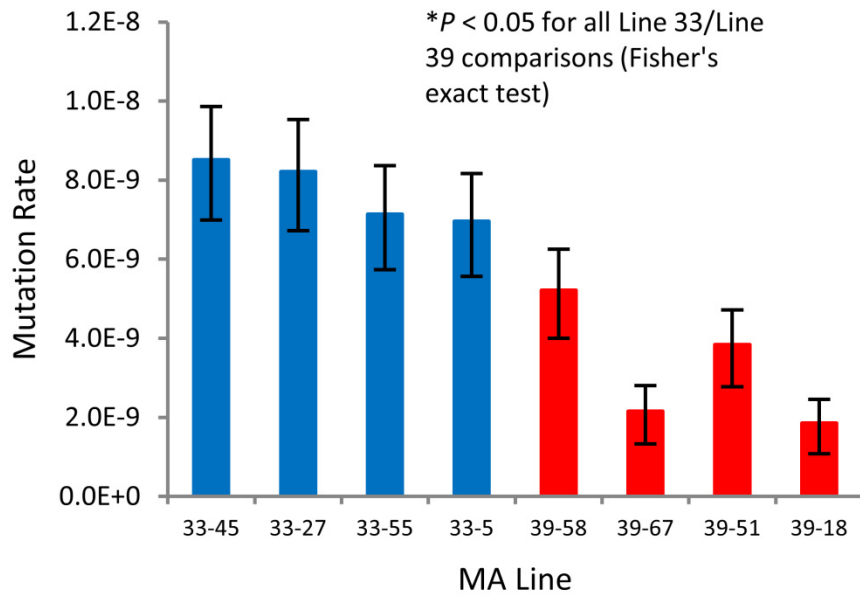

**Figure S1** Point mutation rate estimates for each MA sub-line.

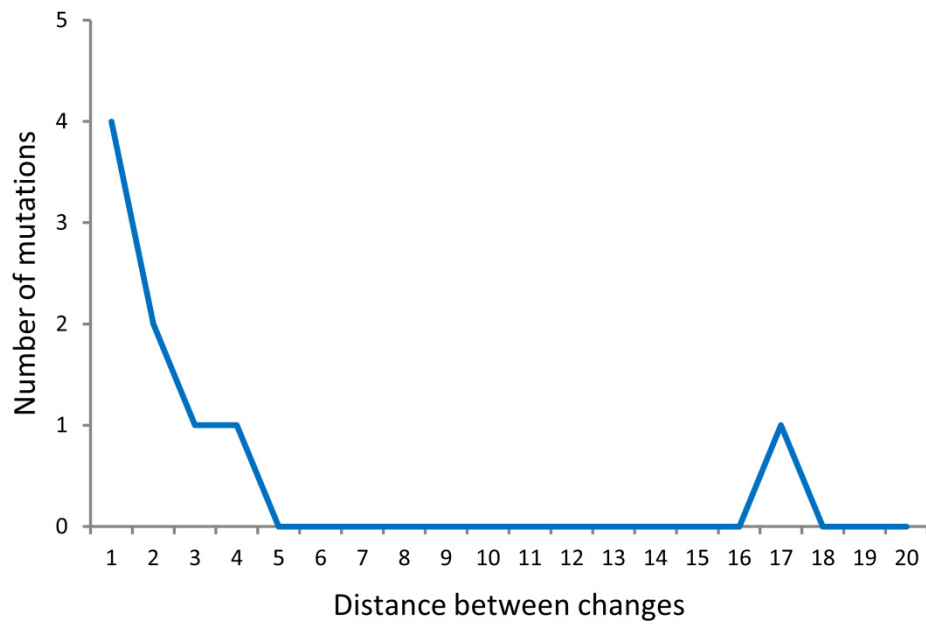

**FigureS2** Distance between base changes for multinucleotide mutations affecting two sites.

Tables S1 and S2 are available for download at <http://www.genetics.org/lookup/suppl/doi:10.1534/genetics.113.151670/-/DC1>.

**Table S1 Point mutations occurring during mutation accumulation.** Positions of mutations validated by Sanger sequencing are marked with asterisks.

**Table S2 Small indels occurring during mutation accumulation.** Positions of mutations validated by Sanger sequencing are marked with asterisks.

**Table S3** Multinucleotide mutations occurring during mutation accumulation, all confirmed by Sanger sequencing.

| Chromosome arm | Coordinates               | Mutation       | Mutant line |
|----------------|---------------------------|----------------|-------------|
| chr2L          | 20628928, 20628930        | G->A;T->G      | 33-27       |
| chr3R          | 2065681, 2065685          | G->A;C->A      | 33-27       |
| chr2L          | 7161924, 7161927          | G->A;A->T      | 33-45       |
| chr2R          | 11166158, 11166159        | G->A;C->A      | 33-45       |
| chr3R          | 18338533, 18338550        | T->C;G->T      | 33-45       |
| chr2L          | 19248550, 9248551         | A->T;G->T      | 33-5        |
| chr3R          | 19467135, 19467136        | A->T;T->A      | 33-55       |
| chrX           | 5940420, 5940434, 5940463 | G->A;G->A;T->C | 33-55       |
| chr3L          | 13034276, 13034277        | T->A;A->T      | 39-51       |
| chrX           | 15730179, 15730181        | T->A;T->A      | 39-58       |

**Table S4** Complex mutations occurring during mutation accumulation, all confirmed by Sanger sequencing.

| Coordinates    | Mutation                               | Mutant line |
|----------------|----------------------------------------|-------------|
| chr2R:3026177  | GGCTATCTTTCTTTCGGAACATTACC→GTATTATTCCT | 33-27       |
| chrX:19646896  | GCAGG→GAAAAGCA                         | 33-27       |
| chr2R:17877493 | GTGCC→GGGT                             | 33-55       |
| chr2L:9526339  | CTATATATGTAG→CATCC                     | 39-51       |
| chr3R:27194562 | CC→CAG                                 | 39-51       |
| chrX:3816859   | ATTTT→ATGT                             | 39-51       |
| chr2L:7806673  | AGATAGGC→AAT                           | 39-58       |

**Table S5 Mutation rate estimates for different minimum read-depth cutoffs.**

| Depth cutoff | No. of mutations in Line 33 | Line 33 rate          | 95% CI                                           | No. of mutations in Line 39 | Line 39 rate          | 95% CI                                        |
|--------------|-----------------------------|-----------------------|--------------------------------------------------|-----------------------------|-----------------------|-----------------------------------------------|
| 5            | 514                         | $7.71 \times 10^{-9}$ | $7.06 \times 10^{-9}$ -<br>$8.40 \times 10^{-9}$ | 218                         | $3.27 \times 10^{-9}$ | $2.85 \times 10^{-9}$ - $3.73 \times 10^{-9}$ |
| 6            | 511                         | $7.77 \times 10^{-9}$ | $7.11 \times 10^{-9}$ -<br>$8.47 \times 10^{-9}$ | 216                         | $3.28 \times 10^{-9}$ | $2.86 \times 10^{-9}$ - $3.75 \times 10^{-9}$ |
| 7            | 503                         | $7.80 \times 10^{-9}$ | $7.13 \times 10^{-9}$ -<br>$8.51 \times 10^{-9}$ | 212                         | $3.28 \times 10^{-9}$ | $2.86 \times 10^{-9}$ - $3.76 \times 10^{-9}$ |
| 8            | 487                         | $7.75 \times 10^{-9}$ | $7.08 \times 10^{-9}$ -<br>$8.47 \times 10^{-9}$ | 207                         | $3.29 \times 10^{-9}$ | $2.86 \times 10^{-9}$ - $3.77 \times 10^{-9}$ |
| 9            | 474                         | $7.81 \times 10^{-9}$ | $7.12 \times 10^{-9}$ -<br>$8.54 \times 10^{-9}$ | 200                         | $3.29 \times 10^{-9}$ | $2.85 \times 10^{-9}$ - $3.77 \times 10^{-9}$ |
| 10           | 454                         | $7.83 \times 10^{-9}$ | $7.12 \times 10^{-9}$ -<br>$8.58 \times 10^{-9}$ | 193                         | $3.31 \times 10^{-9}$ | $2.86 \times 10^{-9}$ - $3.81 \times 10^{-9}$ |
| 11           | 420                         | $7.67 \times 10^{-9}$ | $6.95 \times 10^{-9}$ -<br>$8.43 \times 10^{-9}$ | 182                         | $3.29 \times 10^{-9}$ | $2.83 \times 10^{-9}$ - $3.80 \times 10^{-9}$ |
| 12           | 394                         | $7.72 \times 10^{-9}$ | $6.97 \times 10^{-9}$ -<br>$8.52 \times 10^{-9}$ | 174                         | $3.35 \times 10^{-9}$ | $2.87 \times 10^{-9}$ - $3.89 \times 10^{-9}$ |
| 13           | 365                         | $7.79 \times 10^{-9}$ | $7.01 \times 10^{-9}$ -<br>$8.63 \times 10^{-9}$ | 160                         | $3.33 \times 10^{-9}$ | $2.83 \times 10^{-9}$ - $3.89 \times 10^{-9}$ |
| 14           | 323                         | $7.64 \times 10^{-9}$ | $6.82 \times 10^{-9}$ -<br>$8.51 \times 10^{-9}$ | 144                         | $3.28 \times 10^{-9}$ | $2.77 \times 10^{-9}$ - $3.86 \times 10^{-9}$ |
| 15           | 285                         | $7.59 \times 10^{-9}$ | $6.74 \times 10^{-9}$ -<br>$8.53 \times 10^{-9}$ | 132                         | $3.34 \times 10^{-9}$ | $2.79 \times 10^{-9}$ - $3.96 \times 10^{-9}$ |
| 16           | 249                         | $7.62 \times 10^{-9}$ | $6.71 \times 10^{-9}$ -<br>$8.63 \times 10^{-9}$ | 115                         | $3.28 \times 10^{-9}$ | $2.71 \times 10^{-9}$ - $3.94 \times 10^{-9}$ |
| 17           | 214                         | $7.68 \times 10^{-9}$ | $6.69 \times 10^{-9}$ -<br>$8.79 \times 10^{-9}$ | 99                          | $3.23 \times 10^{-9}$ | $2.63 \times 10^{-9}$ - $3.94 \times 10^{-9}$ |
| 18           | 179                         | $7.70 \times 10^{-9}$ | $6.61 \times 10^{-9}$ -<br>$8.92 \times 10^{-9}$ | 91                          | $3.46 \times 10^{-9}$ | $2.79 \times 10^{-9}$ - $4.25 \times 10^{-9}$ |
| 19           | 142                         | $7.49 \times 10^{-9}$ | $6.31 \times 10^{-9}$ -<br>$8.83 \times 10^{-9}$ | 73                          | $3.29 \times 10^{-9}$ | $2.58 \times 10^{-9}$ - $4.14 \times 10^{-9}$ |
| 20           | 115                         | $7.61 \times 10^{-9}$ | $6.29 \times 10^{-9}$ -<br>$9.14 \times 10^{-9}$ | 60                          | $3.26 \times 10^{-9}$ | $2.49 \times 10^{-9}$ - $4.20 \times 10^{-9}$ |
