# Supplementary material
Source: PubMed Central journal article supplement (PMC3730921)
Supplement: fd36dcd9ab75f909ae43e9fa72de5a6f_genetics.113.151670-3.pdf [file fd36dcd9ab75f909ae43e9fa72de5a6f_genetics.113.151670-3.pdf]

**Table S5 Mutation rate estimates for different minimum read-depth cutoffs.**

| Depth cutoff | No. of mutations in Line 33 | Line 33 rate          | 95% CI                                           | No. of mutations in Line 39 | Line 39 rate          | 95% CI                                        |
|--------------|-----------------------------|-----------------------|--------------------------------------------------|-----------------------------|-----------------------|-----------------------------------------------|
| 5            | 514                         | $7.71 \times 10^{-9}$ | $7.06 \times 10^{-9}$ -<br>$8.40 \times 10^{-9}$ | 218                         | $3.27 \times 10^{-9}$ | $2.85 \times 10^{-9}$ - $3.73 \times 10^{-9}$ |
| 6            | 511                         | $7.77 \times 10^{-9}$ | $7.11 \times 10^{-9}$ -<br>$8.47 \times 10^{-9}$ | 216                         | $3.28 \times 10^{-9}$ | $2.86 \times 10^{-9}$ - $3.75 \times 10^{-9}$ |
| 7            | 503                         | $7.80 \times 10^{-9}$ | $7.13 \times 10^{-9}$ -<br>$8.51 \times 10^{-9}$ | 212                         | $3.28 \times 10^{-9}$ | $2.86 \times 10^{-9}$ - $3.76 \times 10^{-9}$ |
| 8            | 487                         | $7.75 \times 10^{-9}$ | $7.08 \times 10^{-9}$ -<br>$8.47 \times 10^{-9}$ | 207                         | $3.29 \times 10^{-9}$ | $2.86 \times 10^{-9}$ - $3.77 \times 10^{-9}$ |
| 9            | 474                         | $7.81 \times 10^{-9}$ | $7.12 \times 10^{-9}$ -<br>$8.54 \times 10^{-9}$ | 200                         | $3.29 \times 10^{-9}$ | $2.85 \times 10^{-9}$ - $3.77 \times 10^{-9}$ |
| 10           | 454                         | $7.83 \times 10^{-9}$ | $7.12 \times 10^{-9}$ -<br>$8.58 \times 10^{-9}$ | 193                         | $3.31 \times 10^{-9}$ | $2.86 \times 10^{-9}$ - $3.81 \times 10^{-9}$ |
| 11           | 420                         | $7.67 \times 10^{-9}$ | $6.95 \times 10^{-9}$ -<br>$8.43 \times 10^{-9}$ | 182                         | $3.29 \times 10^{-9}$ | $2.83 \times 10^{-9}$ - $3.80 \times 10^{-9}$ |
| 12           | 394                         | $7.72 \times 10^{-9}$ | $6.97 \times 10^{-9}$ -<br>$8.52 \times 10^{-9}$ | 174                         | $3.35 \times 10^{-9}$ | $2.87 \times 10^{-9}$ - $3.89 \times 10^{-9}$ |
| 13           | 365                         | $7.79 \times 10^{-9}$ | $7.01 \times 10^{-9}$ -<br>$8.63 \times 10^{-9}$ | 160                         | $3.33 \times 10^{-9}$ | $2.83 \times 10^{-9}$ - $3.89 \times 10^{-9}$ |
| 14           | 323                         | $7.64 \times 10^{-9}$ | $6.82 \times 10^{-9}$ -<br>$8.51 \times 10^{-9}$ | 144                         | $3.28 \times 10^{-9}$ | $2.77 \times 10^{-9}$ - $3.86 \times 10^{-9}$ |
| 15           | 285                         | $7.59 \times 10^{-9}$ | $6.74 \times 10^{-9}$ -<br>$8.53 \times 10^{-9}$ | 132                         | $3.34 \times 10^{-9}$ | $2.79 \times 10^{-9}$ - $3.96 \times 10^{-9}$ |
| 16           | 249                         | $7.62 \times 10^{-9}$ | $6.71 \times 10^{-9}$ -<br>$8.63 \times 10^{-9}$ | 115                         | $3.28 \times 10^{-9}$ | $2.71 \times 10^{-9}$ - $3.94 \times 10^{-9}$ |
| 17           | 214                         | $7.68 \times 10^{-9}$ | $6.69 \times 10^{-9}$ -<br>$8.79 \times 10^{-9}$ | 99                          | $3.23 \times 10^{-9}$ | $2.63 \times 10^{-9}$ - $3.94 \times 10^{-9}$ |
| 18           | 179                         | $7.70 \times 10^{-9}$ | $6.61 \times 10^{-9}$ -<br>$8.92 \times 10^{-9}$ | 91                          | $3.46 \times 10^{-9}$ | $2.79 \times 10^{-9}$ - $4.25 \times 10^{-9}$ |
| 19           | 142                         | $7.49 \times 10^{-9}$ | $6.31 \times 10^{-9}$ -<br>$8.83 \times 10^{-9}$ | 73                          | $3.29 \times 10^{-9}$ | $2.58 \times 10^{-9}$ - $4.14 \times 10^{-9}$ |
| 20           | 115                         | $7.61 \times 10^{-9}$ | $6.29 \times 10^{-9}$ -<br>$9.14 \times 10^{-9}$ | 60                          | $3.26 \times 10^{-9}$ | $2.49 \times 10^{-9}$ - $4.20 \times 10^{-9}$ |
