# Supplementary material
Source: PubMed Central journal article supplement (PMC3730921)

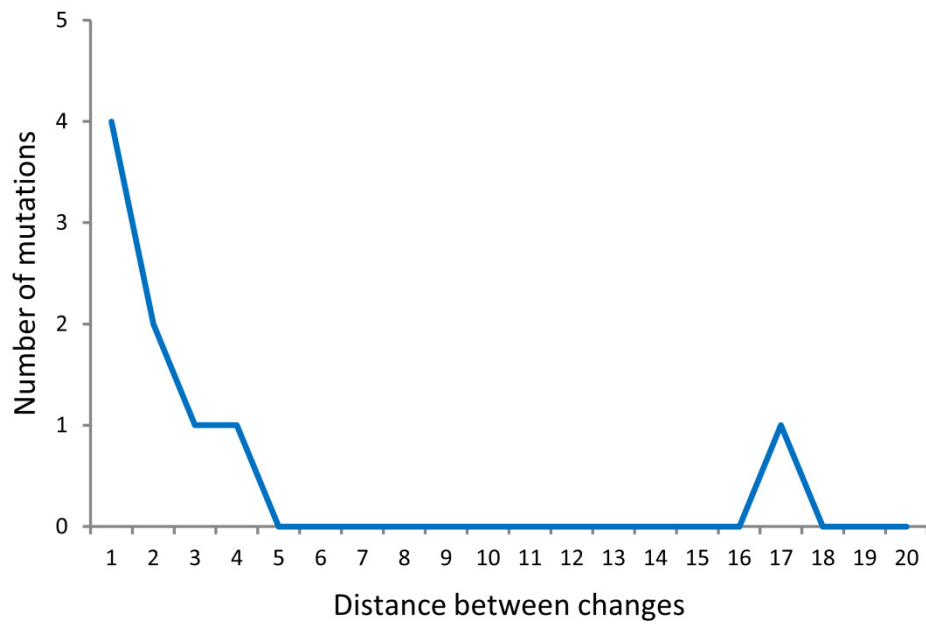

**FigureS2** Distance between base changes for multinucleotide mutations affecting two sites.

Supplement: 792105c3d33e811fdcb0054a0bc089f6_genetics.113.151670-5.pdf [file 792105c3d33e811fdcb0054a0bc089f6_genetics.113.151670-5.pdf]

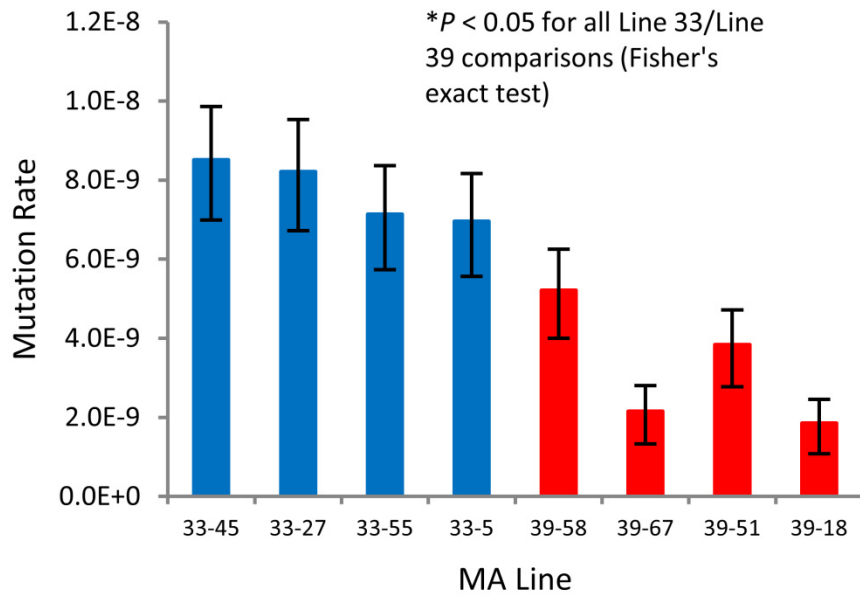

**Figure S1** Point mutation rate estimates for each MA sub-line.

Supplement: d2b2ca68fc1bd920db0d9701936b0c25_genetics.113.151670-8.pdf [file d2b2ca68fc1bd920db0d9701936b0c25_genetics.113.151670-8.pdf]
